# Supplementary material for: De Novo ORFs in Drosophila Are Important to Organismal Fitness and Evolved Rapidly from Previously Non-coding Sequences
Source: PLoS Genet. 2013 Oct 17;9(10):e1003860. doi: 10.1371/journal.pgen.1003860 (PMC3798262; doi:10.1371/journal.pgen.1003860)
Supplement: Table S2 — Evidence of peptide expression for four of six de novo genes. (XLSX) [file pgen.1003860.s005.xlsx]

## Sheet: Sheet1
Supplemental table 2 - evidence for the translation of de novo genes
Gene name	Number of peptides	Embryonic/maternal transcription?	Tissue type	Amino Acids covered by peptides	Protein accessions	PRIDE accessions
CG34434	8	Trace/Trace	early embryo	48 / 460	Q9W4B0	8701, 8708, 8709, 8727
CG31909	5	Trace/No	early embryo	44 / 127	Q8IPI2	8698, 8736
CG31406	22	Trace/No	early embryo	PA: 34 / 148, PB: 66 / 249	Q8INM1, Q8INM2	8698, 8702, 8709, 8710, 8711, 8715, 8716, 8718, 8730, 8738, 8742
CG33235	92	Trace/No	early embryo	582 / 1584	Q7KV35	8697, 8698, 8699, 8701, 8702, 8705, 8707, 8708, 8709, 8719, 8722, 8723, 8727, 8728, 8729, 8732, 8733, 8735, 8737, 8738, 8739, 8741, 8742
CG32690	0	Late/Trace	early embryo	NA	NA	NA
CG32582	0	Yes/Yes	early embryo	NA	NA	NA
